# Supplementary material
Source: Springer Nature journal article supplement (https://www.springermedizin.de/resource/supplementary/12960_2003_8_MOESM7_ESM.pdf/9569742)

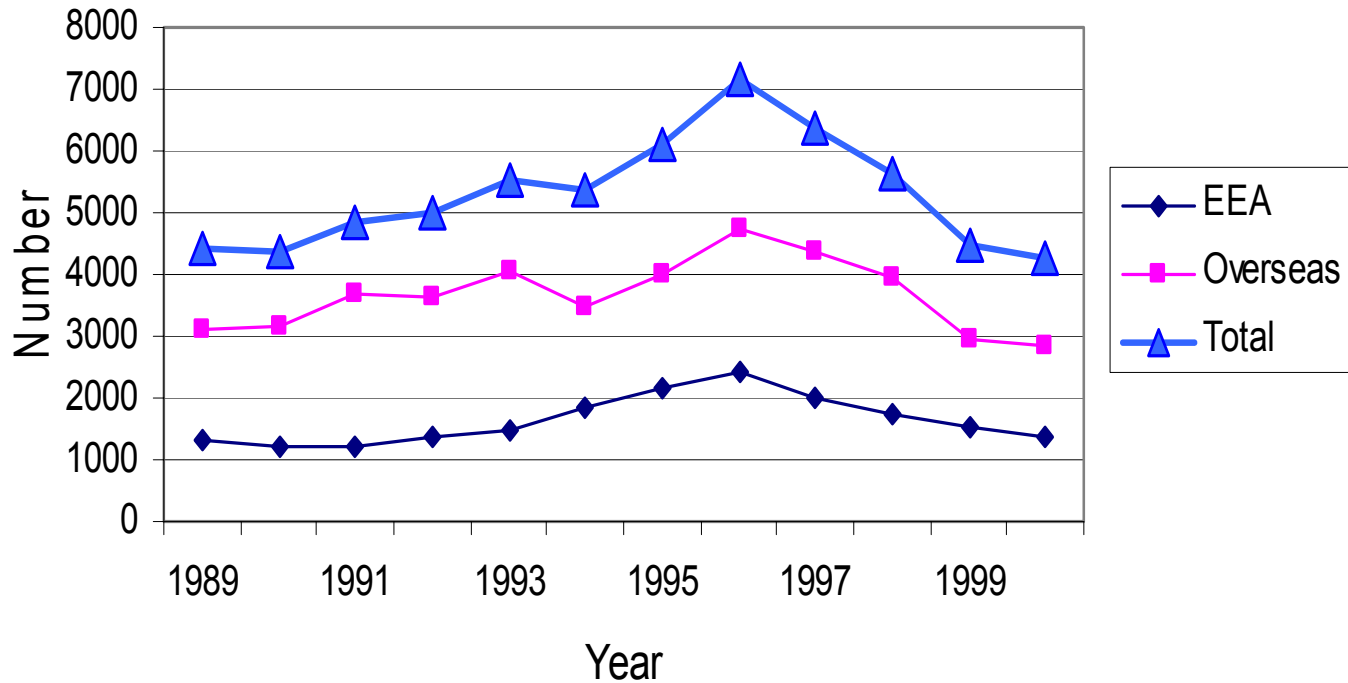

Source: General Medical Council UK, Personal Communication

Supplement: MOESM7 [file 9569742]
